# Supplementary material for: Direct and Indirect Effects of Blood Levels of Omega-3 and Omega-6 Fatty Acids on Reading and Writing (Dis)Abilities
Source: MDPI journal article supplement (doi:10.3390/brainsci12020169), 2022-01-27
Supplement: s1 [file s1]

# Supplementary materials

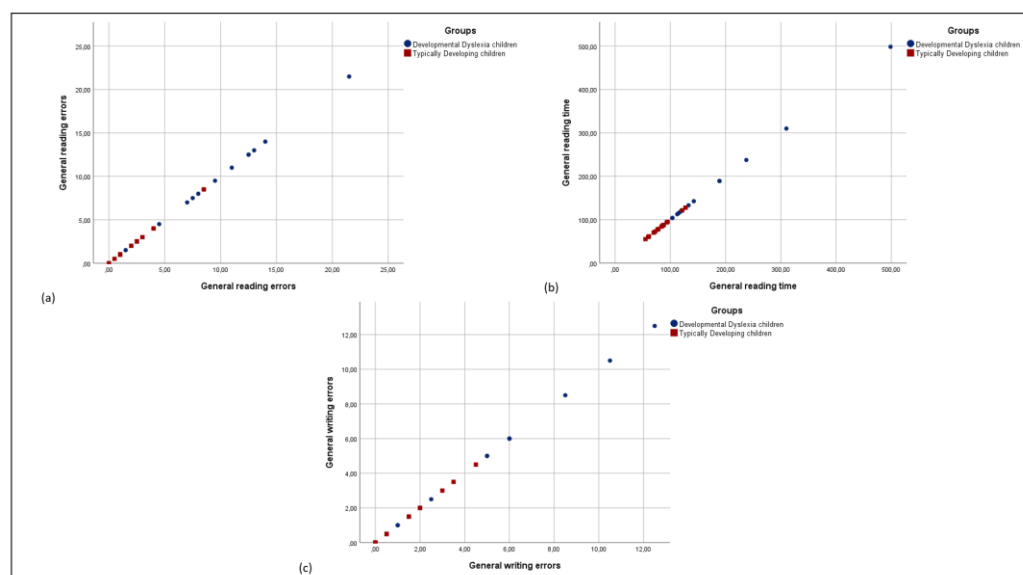

**Figure S1.** Distributions of raw scores for general reading errors (a), general reading time (b), and general writing errors (c). Blue dots represent children with developmental dyslexia (DD); red dots represent typically developing children (TD).

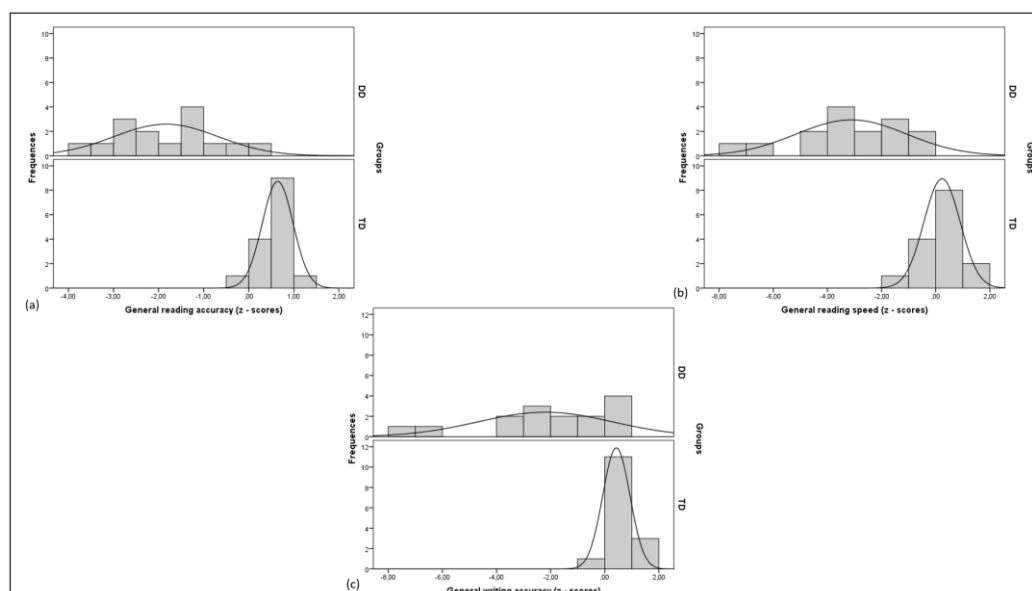

**Figure S2.** Distributions of z-scores for general reading accuracy (a), general reading speed (b), and general writing accuracy (c).

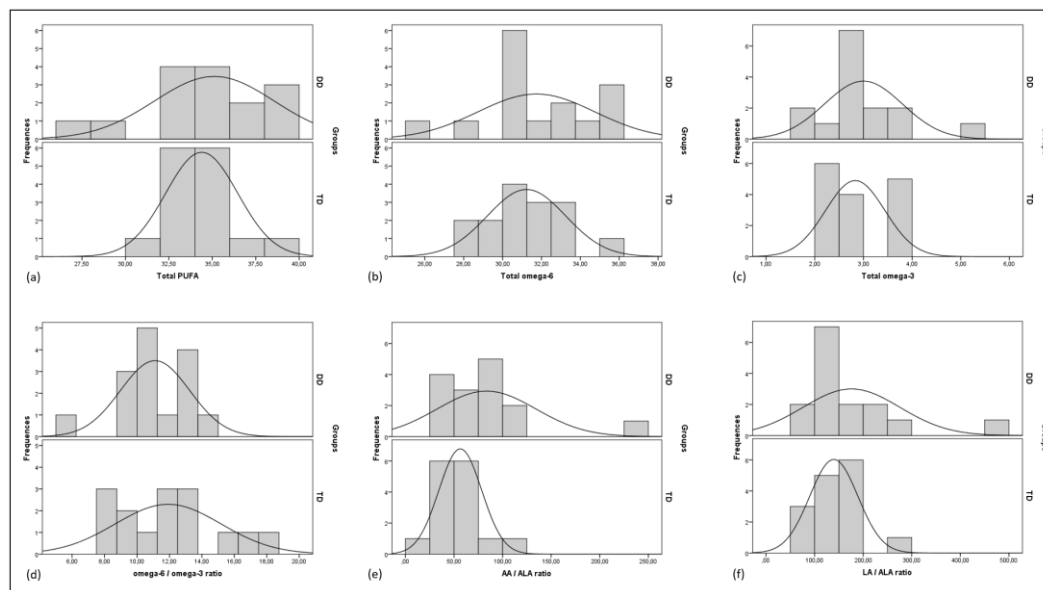

**Figure S3.** Distributions of the blood levels of total PUFA (a), total omega-6 (b), total omega-3 (c), omega-6/omega-3 ratio (d), AA/ALA ratio (e), and LA/ALA ratio (f).

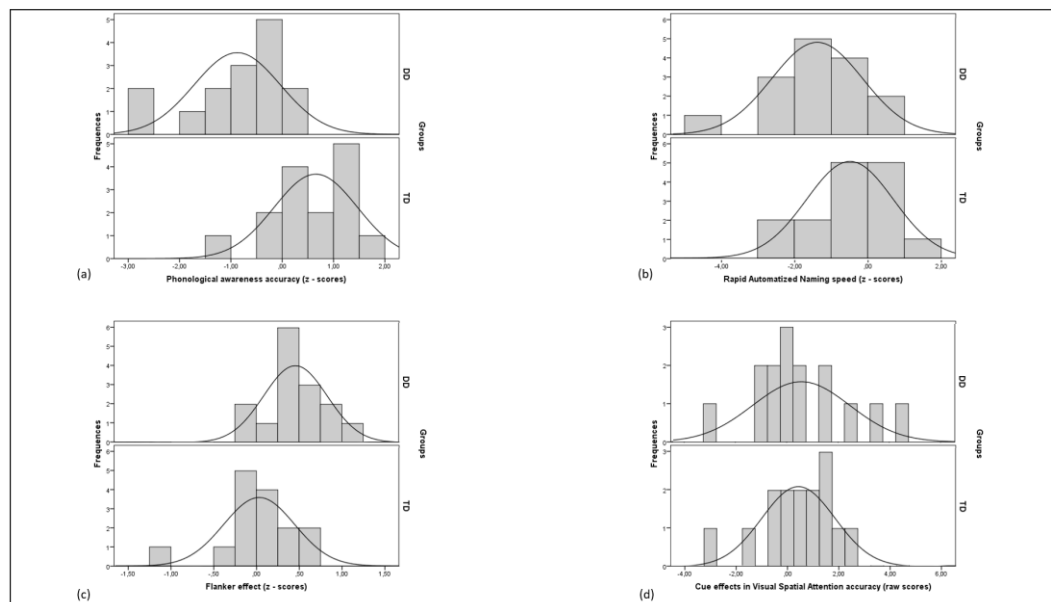

**Figure S4.** Distribution of the performances on the neuropsychological tests, phonological awareness (a), rapid automatized naming (b), flanker effect (c), cue effects in visual spatial attention (d).
